# Supplementary material for: Chemical and Sensory Impacts of Accentuated Cut Edges (ACE) Grape Must Polyphenol Extraction Technique on Shiraz Wines
Source: PubMed Central journal article supplement (PMC7466200; doi:10.3390/foods9081027), 2020-07-31
Supplement: foods-09-01027-s001.pdf [file foods-09-01027-s001.pdf]

## Supplementary Materials :

Table S1. List of sensory attributes scored in the rate-all-that-apply (RATA) assessment.

| No.               | Attribute abbreviation | Definition |                                                                              |                |                                                                        |
|-------------------|------------------------|------------|------------------------------------------------------------------------------|----------------|------------------------------------------------------------------------|
| <b>Color</b>      | 1                      | C_R        | Intensity of red color                                                       |                |                                                                        |
|                   | 2                      | C_P        | Intensity of purple color                                                    |                |                                                                        |
|                   | 3                      | C_B        | Intensity of brown color                                                     |                |                                                                        |
| No.               | Attribute abbreviation | No.        | Attribute abbreviation                                                       | Definition     |                                                                        |
| <b>Aroma</b>      | 4                      | A_DF       | 26                                                                           | F_DF           | Dark fruit (e.g. blackberry, blackcurrant, plum, and dark cherry...)   |
|                   | 5                      | A_RF       | 27                                                                           | F_RF           | Red fruit (e.g. raspberry, strawberry, red cherry, and red current...) |
|                   | 6                      | A_DrF      | 28                                                                           | F_DrF          | Dried fruit (e.g. prune, raisins, fig and dried apricote...)           |
|                   | 7                      | A_Ja       | 29                                                                           | F_Ja           | Jammy                                                                  |
|                   | 8                      | A_Con      | 30                                                                           | F_Con          | Confectionery (e.g. candy, lolly, fruit drops...)                      |
|                   | 9                      | A_Choc     | 31                                                                           | F_Cho          | Chocolate                                                              |
|                   | 10                     | A_CN       | 32                                                                           | F_Co           | Coconut                                                                |
|                   | 11                     | A_CV       | 33                                                                           | F_CV           | Cooked vegetables (e.g. cabbage and beans...)                          |
|                   | 12                     | A_ED       | 34                                                                           | F_ED           | Earthy / Dusty                                                         |
|                   | 13                     | A_EM       | 35                                                                           | F_EM           | Eucalypt / Mint                                                        |
|                   | 14                     | A_FL       | 36                                                                           | F_FL           | Floral / Perfume / Musk                                                |
|                   | 15                     | A_FFM      | 37                                                                           | F_FFM          | Forest floor / Mushrooms                                               |
|                   | 16                     | A_GP       | 38                                                                           | F_GP           | Green pepper / Capsicum                                                |
|                   | 17                     | A_Her      | 39                                                                           | F_Her          | Herbaceous                                                             |
|                   | 18                     | A_Le       | 40                                                                           | F_Le           | Leather                                                                |
|                   | 19                     | A_Pep      | 41                                                                           | F_Pep          | Pepper (black and white pepper)                                        |
|                   | 20                     | A_Sav      | 42                                                                           | F_Sav          | Savoury / Meaty / Gamey                                                |
|                   | 21                     | A_Sp       | 43                                                                           | F_Sp           | Spice (e.g. anise, clove, cinnamon, liquorice, and nutmeg...)          |
|                   | 22                     | A_SS       | 44                                                                           | F_SS           | Stemmy / Stalky                                                        |
|                   | 23                     | A_TS       | 45                                                                           | F_TS           | Toasty / Smoky                                                         |
|                   | 24                     | A_Van      | 46                                                                           | F_Van          | Vanilla                                                                |
|                   | 25                     | A_Wo       | 47                                                                           | F_Wo           | Woody (e.g. cedar, pencil shavings, and cigar box...)                  |
|                   | <b>Taste</b>           | 48         | T_B                                                                          | Bitterness     |                                                                        |
|                   |                        | 27         | T_Sw                                                                         | Sweet          |                                                                        |
|                   |                        | 28         | T_A                                                                          | Sour / Acidity |                                                                        |
| <b>Mouthfeel</b>  | 51                     | MF_B       | Wine body                                                                    |                |                                                                        |
|                   | 52                     | MF_OH      | Alcohol level / Heat                                                         |                |                                                                        |
|                   | 53                     | MF_Ast     | Astringency / Tannin                                                         |                |                                                                        |
|                   | 54                     | MF_Sm      | Smoothness                                                                   |                |                                                                        |
|                   | 55                     | MF_Ro      | Roughness                                                                    |                |                                                                        |
|                   | 56                     | MF_Vis     | Viscosity (the resistance of the wine when you move it around on the palate) |                |                                                                        |
| <b>Aftertaste</b> | 57                     | AT_F       | Length of the aftertaste of fruit flavors                                    |                |                                                                        |
|                   | 58                     | AT_NF      | Length of the aftertaste of non-fruit flavors                                |                |                                                                        |

Table S2. The model performance for the first run of Partial Least Squares regression. The discriminated astringency attributes are Y-variables and significantly different chemical parameters are X-variables.

| Model quality of Partial Least Squares regression |       |                    |
|---------------------------------------------------|-------|--------------------|
| Statistic                                         | Comp1 | <sup>a</sup> Comp2 |
| <sup>b</sup> Q <sup>2</sup> cum                   | 0.185 | 0.748              |
| <sup>c</sup> R <sup>2</sup> Y cum                 | 0.637 | 0.944              |
| <sup>c</sup> R <sup>2</sup> X cum                 | 0.417 | 0.750              |

  

| Variable Importance in the Projection (VIP): |               |               |
|----------------------------------------------|---------------|---------------|
| Variable                                     | VIP for Comp1 | VIP for Comp2 |
| GPC MM (g/mol)                               | 2.073         | <b>1.849</b>  |
| Total tannin                                 | 1.886         | <b>1.555</b>  |
| Total phenolics                              | 1.824         | <b>1.502</b>  |
| Galacturonic acid                            | 1.181         | <b>1.037</b>  |
| %gall                                        | 1.179         | <b>1.021</b>  |
| Fucose                                       | 0.666         | <b>0.995</b>  |
| Total Poly                                   | 0.978         | <b>0.928</b>  |
| Galactose                                    | 0.907         | 0.862         |
| Rhamnose                                     | 0.739         | 0.855         |
| Arabinose                                    | 0.738         | 0.828         |
| HPLC MM (g/mol)                              | 0.031         | 0.799         |
| %Tri-OH                                      | 0.283         | 0.796         |
| mDP                                          | 0.012         | 0.787         |
| pH                                           | 0.240         | 0.772         |
| Alcohol                                      | 0.589         | 0.705         |
| Titratable acid pH 8.2                       | 0.322         | 0.689         |
| Glucuronic acid                              | 0.335         | 0.539         |
| Glucose                                      | 0.148         | 0.172         |

<sup>a</sup> The optimum number of components/latent variables required for this model was 2 (determined by the automatic function in the XLSTAT).

<sup>b</sup> The Q<sup>2</sup> cumulative index measures the global goodness of fit and the predictive quality of the models.

<sup>c</sup> The cumulative R<sup>2</sup>Y and R<sup>2</sup>X cum that corresponds to the correlations between the explanatory (X) and dependent (Y) variables with the components are very close to 1 with 2 components.

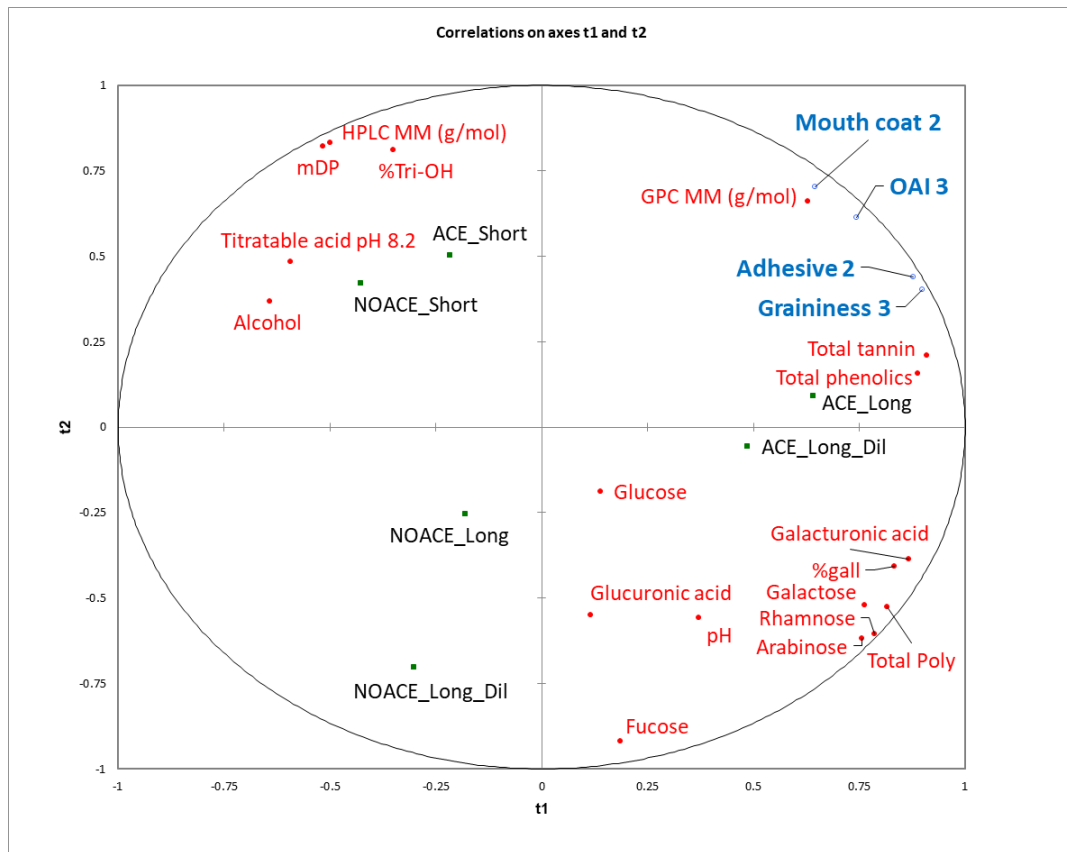

Figure S1. The plot of the first run of Partial Least Squares regression between the significantly different sensory attributes from PP (in blue) and significantly different chemical parameters (in red). Shiraz wines (in black) prepared following NOACE and ACE maceration with either 3 days (Short) or 6 days (Long) on skins, or 6 days on skins with pre-fermentation water dilution to 13.5 Bé (Long\_Dil). %Tri-OH, %gall and total poly are epigallocatechin(%), epicatechin gallate (%) and total polysaccharides, respectively.
